# Supplementary material for: The effects of livestock grazing on physicochemical properties and bacterial communities of perlite-rich soil
Source: PeerJ. 2024 Oct 23;12:e18433. doi: 10.7717/peerj.18433 (PMC11512551; doi:10.7717/peerj.18433)
Supplement: Supplemental Information 3 [file peerj-12-18433-s003.xlsx]

## Sheet: Soil physicochemistry raw data
	Parameter	Sampling sites										t-test		Sign test
		Grazed site					Ungrazed site
		1	2	3	4	5	1	2	3	4	5	t	p-value	Z	p-value
	Sand	65	65	69	73	29	69	71	75	81	45	-3.81385	0.0188776	2.23607	0.02535
	Silt	28	20	24	21	59	26	22	22	14	36	1.45832	0.218504	1.34164	0.17971
	Clay	7	9	7	6	19	5	7	3	5	12	2.99707	0.0400574	2.23607	0.02535
	pH	6.8	5.4	6.2	6.1	5.9	6.1	4.9	6.4	5.6	5.2	2.64849	0.0570718	1.34164	0.17971
	Electrical conductivity	0.11	0.06	0.03	0.04	0.06	0.01	0.03	0.02	0.03	0.05	1.83533	0.140357	2.23607	0.02535
	Organic matter	68.8	19.8	4.97	23.7	29.6	16.5	18.2	1.1	9.12	22.4	1.70007	0.164341	2.23607	0.02535
	Organic carbon	39.9	11.5	2.88	13.8	17.1	9.6	10.5	0.64	5.29	13	1.70318	0.163744	2.23607	0.02535
	Total N	3.16	0.97	0.31	0.99	1.23	0.74	0.777	0.09	0.54	0.92	1.68011	0.168233	2.23607	0.02535
	NH4	2.8	12.6	2.8	7	8.4	1.4	1.4	1.4	4.2	7	1.90641	0.129279	2.23607	0.02535
	NO3	9.8	12.6	9.8	8.4	1.6	7	2.8	1	2.8	1.4	3.02334	0.0390348	2.23607	0.02535
	C/N ratio	12.6	10.9	9.28	9.83	14.1	13.1	14.9	7.54	14	14	-0.856029	0.416883	0.44721	0.65472
	Available P	465	324	169	239	334	295	109	102	223	108	3.33617	0.0289387	2.23607	0.02535
	Available K	126	7.18	7.35	7.7	29.1	7.46	6.03	3.31	2.94	8.88	1.32495	0.255808	2.23607	0.02535
	Available Ca	2006	454	893	727	715	646	128	345	335	675	2.39664	0.0746281	2.23607	0.02535
	Available Mg	491	77	182	109	219	132	25.2	69.8	71.8	87.7	2.38693	0.075419	2.23607	0.02535
	Extractable Zn	1.4	0.98	0.25	0.92	1.82	1.92	0.45	0.11	0.41	1.12	1.24731	0.280325	1.34164	0.17971
	Extractable Mn	74.7	32.4	16.4	40.8	50.9	38	21.1	5.12	22.2	45.8	3.03849	0.0384591	2.23607	0.02535
	Extractable Fe	60.2	101	10.4	24.3	74.4	21.1	15.6	8.5	19.9	65.1	1.77111	0.151244	2.23607	0.02535
	Extractable SO4	83.5	37	29.9	44	51.2	43.2	38.8	27.7	39.4	48.4	1.24274	0.281837	1.34164	0.17971
	Soluble Si	46.6	14.1	17.9	11.3	12.5	11.3	6.26	8.46	10.2	9.47	1.83527	0.140367	2.23607	0.02535
